# Supplementary material
Source: publisher figshare collection journal article supplement (https://acs.figshare.com/ndownloader/files/3701305)
Supplement: Supplementary file 1 [file 3701305]

---

## Supporting Information

### **Achieving Extreme Utilization of Excitons by an Efficient Sandwich-Type Emissive Layer Architecture for Reduced Efficiency Roll-Off and Improved Operational Stability in Organic Light-Emitting Diodes**

*Zhongbin Wu,<sup>†</sup> Ning Sun,<sup>‡</sup> Liping Zhu,<sup>†</sup> Hengda Sun,<sup>†</sup> Jiaxiu Wang,<sup>†</sup> Dezhi Yang,<sup>†</sup>  
Xianfeng Qiao,<sup>†</sup> Jiangshan Chen,<sup>†</sup> Saad M. Alshehri,<sup>§</sup> Tansir Ahamad,<sup>§</sup> and Dongge  
Ma<sup>\*†,§</sup>*

<sup>†</sup>State Key Laboratory of Polymer Physics and Chemistry, Changchun Institute of Applied Chemistry, University of Chinese Academy of Sciences, Changchun, 130022, People's Republic of China.

<sup>‡</sup>The Organic Photonics and Electronics Group, Department of Physics Umeå University, SE-901 87 Umeå, Sweden

<sup>§</sup>Department of Chemistry, King Saud University, Riyadh, Kingdom of Saudi Arabia

### **Corresponding Author**

\*E-mail: [mdg1014@ciac.ac.cn](mailto:mdg1014@ciac.ac.cn)

---

*Deducing process about the  $k_{TT}$  and  $k_{TP}$*

Under device operating conditions, the exciton population becomes:<sup>1,2</sup>

$$\frac{dn_{ex}}{dt} = -\frac{n_{ex}}{\tau} - \frac{1}{2}k_{TT}n_{ex}^2 - k_{TP}\rho n_{ex} + \frac{J}{eW} \quad (1)$$

where  $\frac{J}{eW}$  represents electrical generation of excitons,<sup>3</sup>  $e$  is the elementary charge,  $W$  is the width of the exciton formation zone.  $n_{ex}$  is the exciton density,  $\tau$  is exciton lifetime,  $\rho$  is the polaron density,  $k_{TT}$  and  $k_{TP}$  are the rate coefficient of TTA and TPQ.

A steady-state solution ( $dn_{ex}/dt = 0$ ) to Equation (1) can be found which describes the photon output per electron input, which is equivalent to the external quantum efficiency  $\eta_{EQE}$ . That solution is:<sup>1</sup>

$$\frac{\eta_{EQE}}{\eta_0} = \Theta \left( \sqrt{\frac{\Delta^2 + \Gamma k_{TT}}{k_{TT}^2}} - \frac{\Delta}{k_{TT}} \right) \quad (2)$$

$$\Theta = \frac{eW}{\tau J} \quad (3)$$

$$\Delta = \left( \frac{1}{\tau} + k_{TP} C J^{1/l+1} \right) \quad (4)$$

$$\Gamma = \frac{2J}{eW} \quad (5)$$

where a relationship between the current density and polaron in a full device is

assumed,  $\rho = Cj^{1/l+1}$ ,  $C$  is a constant which describes the electronic properties of the device, e.g., the mobility, dielectric constant-which can only be estimated, and  $l$  is taken to be unity, according to the simple Mott-Gurney relation.<sup>1</sup>

The Equation S2 (the same as the Equation 4) is used to fit the obtained device's EQEs. It can be seen that the behavior is determined by four parameters:  $\tau$ ,  $W$ ,  $k_{TT}$ ,  $k_{TP}$ . Here, we assume the exciton lifetime  $\tau$  of Ir(ppy)<sub>2</sub>(acac) is 1.5  $\mu$ s,<sup>4</sup> the exciton recombination zone width  $W$  is between 2-8 nm. Thus, by the Equation S2 we can obtain the  $k_{TT}$ , and  $k_{TP}$  values.

#### References:

- (1) Reineke, S.; Walzer, K.; Leo, K. Triplet-Exciton Quenching in Organic Phosphorescent Light-Emitting Diodes with Ir-Based Emitters. *Phys. Rev. B* **2007**, *75*, 125328.
- (2) Erickson, N. C.; Holmes, R. J. Engineering Efficiency Roll-Off in Organic Light-Emitting Devices. *Adv. Funct. Mater.* **2014**, *24*, 6074–6080.
- (3) Baldo, M. A.; Adachi, C.; Forrest, S. R. Transient Analysis of Organic Electrophosphorescence. II. Transient Analysis of Triplet-Triplet Annihilation. *Phys. Rev. B* **2000**, *62*, 10967.
- (4) Murawski, C.; Leo, K.; Gather, M. C. Efficiency Roll-Off in Organic Light-Emitting Diodes. *Adv. Mater.* **2013**, *25*, 6801–6827.
